# Supplementary material
Source: PubMed Central journal article supplement (PMC9998345)
Supplement: NIHMS1854996-supplement-Suppl_methods_and_figures.pdf [file NIHMS1854996-supplement-Suppl_methods_and_figures.pdf]

## 1 Supplemental Material

### 2 Materials and Methods

#### 3 Reagents

4 All chemicals were from Sigma-Aldrich (St. Louis, MO) unless otherwise indicated. Apigenin  
5 was from MedChemExpress (Monmouth Junction, NJ). Recombinant human IL-1 $\beta$  and human  
6 total MMP-3 and MMP-13 DuoSet enzyme-linked immunosorbent assay (ELISA) kits (DY-513  
7 and DY-511) were from R&D Systems Inc. (Minneapolis, MN). The reagents for  
8 immunohistochemistry (IHC) were from Vector Laboratories (Burlingame, CA). Antibodies for  
9 Western blotting include CD38 (#51000), SIRT1 (#2496), phospho-NF- $\kappa$ B p65 Ser 536 (#3033),  
10 acetyl-NF- $\kappa$ B p65 Lys310 (#12629), NF- $\kappa$ B p65 (#8242), phospho-Stat1 Tyr701 (#9167),  
11 phospho-Stat1 Ser727 (#8826) and Stat1 (#14944) were from Cell Signaling Technology, Inc  
12 (Danvers, MA).

#### 13 Studies of human articular chondrocytes

14 Studies were performed in compliance with institutional IRB and approved protocol of human  
15 subjects #H170130 at the VA Medical Center of San Diego. Human chondrocytes were isolated  
16 from knee cartilage of surgical waste from total knee arthroplasty using the methods described  
17 previously (1) and were cultured in Dulbecco's modified Eagle's (DMEM) high glucose medium  
18 with 10% fetal calf serum (FCS), 100  $\mu$ g/ml streptomycin, and 100 IU/ml penicillin at 37°C. No  
19 later than first passage chondrocytes were used. Chondrocytes were plated at  $2.5 \times 10^5$ /well in  
20 12-well or  $5 \times 10^5$ /well in 6-well plates for *in vitro* experiments. To overexpress CD38,  
21 chondrocytes were transfected with pCMV3-CD38-Myc (#HG-10818-CM, SinoBiological,  
22 Wayne, PA) plasmid and the empty plasmid vector for 48 hours using X-tremeGENE HP DNA  
23 Transfection Reagent (#XTGHP-RO, MilliporeSigma, Burlington, MA).

#### 24 Quantitative RT-PCR

25 Total RNA was extracted from chondrocytes using the RNeasy Mini kit (Qiagen, Germantown,  
26 MD) and then used for reverse transcription to generate cDNA using the cDNA synthesis kit  
27 (MilliporeSigma, Burlington, MA). The cDNAs were subjected to quantitative PCR (SYBR  
28 Green) analysis for gene expression of *aggrecan* (*ACAN*), *collagen2a1* (*Col2a1*), *MMP3* and  
29 *MMP13* using the efficiency-adjusted  $\Delta\Delta$ CT method. The PCR primer sequences were shown in  
30 the table below. Total RNA samples isolated directly from human knee cartilage of normal and  
31 OA donors kindly provided by Dr. Martin Lotz (The Scripps Research Institute) were used for  
32 analysis of *CD38* gene expression using TaqMan Gene Expression Assay probe sets  
33 (ThermoFisher, Waltham, MA) for CD38 (Hs01120071\_m1) and endogenous control GAPDH  
34 (Hs02786624\_g1). The data was analyzed using the  $\Delta\Delta$ CT method. For each sample,  $\Delta$ CT  
35 ( $CT_{\text{sample}} - CT_{\text{GAPDH}}$ ) value was used to subtract the mean  $\Delta$ CT of normal donors to calculate its  
36  $\Delta\Delta$ CT value and then relative fold of gene expression. The data was presented as fold changes  
37 relative to the mean of normal donors.

| Gene            | Primer sequences              |
|-----------------|-------------------------------|
| <i>Aggrecan</i> | Forward: ACAGATGCTTCCATCCCAGC |
|                 | Reverse: GATGCTGCTCAGGTGTGACT |
| <i>Col2a1</i>   | Forward: GTGAGCCATGATTCGCCTCG |
|                 | Reverse: TCACAGACACAGATCCGGCA |

|              |                                |
|--------------|--------------------------------|
| <i>MMP3</i>  | Forward: TGG GCCAGGGATTAATGGAG |
|              | Reverse: CCGAGTCAGGTCTGTGAGTG  |
| <i>MMP13</i> | Forward: AGGAGCATGGCGACTTCTAC  |
|              | Reverse: AGACCTAAGGAGTGGCCGAA  |

42

43 **Western Blotting**

44 Cells were lysed in RIPA buffer with 2 mM sodium vanadate and protease inhibitor cocktails  
 45 (Roche, Mannheim, Germany). Cell lysates (10-15 µg) were separated by gradient 4-20% SDS-  
 46 PAGE and transferred onto nitrocellulose membranes (Bio-Rad, Hercules, California), probed  
 47 with primary and secondary antibodies, exposed to SuperSignal West Pico Chemiluminescent  
 48 Substrate (Thermo Fisher, Scientific, Waltham, MA), and visualized by autoradiography.  
 49 Alternatively, after primary antibody incubation, the membranes were washed and then  
 50 incubated with near-infrared secondary antibodies. After washing, the membranes were scanned  
 51 on the Li-COR Odyssey imaging system.

52

53 **Measurement of NAD glycohydrolase (NADase) activity, NAD<sup>+</sup> and NADH**

54 Etheno-NAD (N2630, Sigma), a modified NAD<sup>+</sup> molecule which, when hydrolyzed, produces a  
 55 fluorescent etheno-ADP-ribose product, was used to evaluate NADase activity. As described  
 56 previously (2), cellular NADase activity was determined by following the change in fluorescence  
 57 at 300 nm excitation and 410 nm emission. Intracellular NAD<sup>+</sup> and NADH were quantified using  
 58 a NAD/NADH quantification colorimetric kit (#K337-100, BioVision, Milpitas, CA).

59

60 **Measurement of production of MMP-3, MMP-13, and glycosaminoglycan (GAG) from**  
 61 **conditioned media**

62 The conditioned media from chondrocyte or cartilage explants experiments were used to measure  
 63 production of MMP-3 and MMP-13 by ELISA analysis and GAG using the colorimetric assay  
 64 with cationic 1,9 Dimethylmethylene Blue (DMB) Dye method (3).

65

66 **Experimental OA model in mice**

67 All animal experiments were performed in compliance with the approved protocol #A14-010  
 68 from the Institutional Animal Care and Use Committee (IACUC) of VA Medical Center of San  
 69 Diego. WT and CD38 KO mice in C57BL/6 background were housed in static, polysulfone,  
 70 microisolation cages and maintained on a 12:12-h light: dark cycle with caging, food and water  
 71 bottles changed weekly. Mice at 16 weeks of age were subjected to destabilization of the medial  
 72 meniscus (DMM) surgery under anesthesia condition as previously described (4). Sham surgeries  
 73 were performed on separate groups of mice. To study the effect of apigenin, a competitive  
 74 inhibitor of CD38 (5), on OA development, C57BL/6 mice were randomly assigned to treatment  
 75 and control (non-treated) groups after DMM surgery. The treatment group received apigenin at  
 76 20 mg/kg/day the day after DMM surgery via gavage daily. The non-treated control group  
 77 received only the vehicle control. All mice were euthanized at 2 or 10 weeks after surgery by  
 78 carbon dioxide inhalation, and OA phenotype of knee joints were analyzed. Only male mice  
 79 were used because they develop more robust and consistent OA and associated pain behaviors  
 80 than female mice following DMM (6,7). For mice euthanized at 10 weeks post-surgery, 96 mice  
 81 were used including 20 WT and 20 CD38KO mice (10/group for DMM and sham) and 18 WT  
 82 mice with apigenin treatment and 18 WT mice with vehicle control (9/group for sham and  
 83 DMM). The sample size of 9-10/group was determined with an assumption of a pooled standard

84 deviation of 1.5 units to achieve a power of 80% and a level of significance of 5% for detecting a  
85 true difference in means between WT and CD38KO or non-treated and apigenin-treated groups  
86 of 2 units. Mice euthanized at 2 weeks post-DMM surgery were used for H&E staining and  
87 fluorescence IHC analysis of CD38 expression in the synovium. 6 WT and 6 CD38KO mice  
88 (2/group for sham and 4/group for DMM) and 6 WT mice treated with apigenin (2 for sham, 4  
89 for DMM) were used.

90

### 91 **Micro-CT assessment of subchondral bone plate**

92 Mouse knee joints were subjected to micro-computed tomography scan (Skyscan-1076, Bruker,  
93 Kontich, Belgium) with a voxel resolution of 9  $\mu\text{m}$ . Each knee joint sample was scanned in one  
94 field encompassing the distal mid-femur and proximal mid-tibia using imaging parameters of 50  
95 kVp, 200  $\mu\text{A}$ , 0.8° step rotations, and 3-frame averaging. The scanned images were evaluated  
96 using CT Analyzer software (Skyscan) for subchondral bone changes at the same thresholds to  
97 allow 2-dimensional (2-D) and 3-D structural rendering of each sample. Regions of interest  
98 (ROIs) from femur and tibia were manually contoured by drawing 2D regions of interest as  
99 described in (8). Because the bone changes occurring underneath of the articular cartilage layer  
100 (subchondral bone plate) was our focus, care was taken not to include any outgrowing  
101 osteophytes. Bone mineral density (BMD) was determined based on hydroxyapatite (HA)  
102 reference and presented as  $\text{mgHA}/\text{cm}^3$ .

103

### 104 **Histology assessment of joint structural changes**

105 Following micro-CT scanning, mouse knees were fixed, decalcified, embedded in paraffin, and  
106 coronally sectioned (5 micron). For each knee, 6-8 slides at ~40-micron intervals were stained  
107 with safranin-O/Fast green. Cartilage damage was evaluated using the OARSI score system (9)  
108 by two blinded observers. Synovitis scores were determined based on changes in synovial lining  
109 thickness and cellular density in the synovial stroma as previously described in (10). Osteophyte  
110 formation was evaluated semi-quantitatively based on both size and maturity of osteophytes (11).

111

### 112 **Immunohistochemistry (IHC)**

113 Sections of human knee cartilage or mouse knees were subjected to antigen retrieval  
114 using trypsin digestion for 15 min, and sequentially treated with 3%  $\text{H}_2\text{O}_2$  for 10 min and  
115 blocked with 10% normal goat serum for 1 h. Sections were then incubated with primary  
116 antibodies CD38 (1:100, #A1680, Abclonal) and SIRT1 (1:100, #MABE426, MilliporeSigma)  
117 and the negative control rabbit IgG (1:50) overnight at 4°C. After washing, sections were  
118 incubated with secondary biotinylated goat anti-rabbit antibody for 30 min, followed by  
119 incubation with the ImmPRESS Universal Antibody Polymer Reagent (#MP-7500, Vector Labs).  
120 IHC signals were revealed by ImmPACT DAB Peroxidase Substrate. Fluorescence method was  
121 used for IHC analysis of expression of CGRP, CD38 and F4/80. Briefly, mouse knee sections  
122 were incubated with Alexa Fluor 594 conjugated CGRP (1:100, #BS-0791R-A594, Bioss  
123 Antibodies), Alexa Fluor 594 conjugated CD38 (#102725, BioLegend) and Alexa Fluor 488  
124 conjugated F4/80 (#123120, BioLegend) overnight at 4°C. After washing, sections were  
125 incubated with diluted DAPI solution for 2-5 minutes and slides were mounted with the Prolong  
126 Gold Antifade reagent (#P36930, ThermoFisher).

127

### 128 **Pain behavioral assessment**

129 To evaluate stimulus evoked nociception, mechanical allodynia was measured using the Electric  
130 Von Frey system (Bioseb) operated under similar principles as manual von Frey (12). Prior to  
131 von Frey hind paw test, the mice were allowed to acclimate to the evaluation environment for  
132 15-30 minutes on a wire mesh grid. The tests were performed at 1 week before (baseline) and  
133 every 2 weeks after DMM surgery in a blind manner in the same order of cages of mice each  
134 time. To assess non-stimulus evoked nociception, the static weight bearing touch was evaluated  
135 using the Incapacitance Test system (Bioseb), which allowed to measure weight distribution on  
136 both rear paws to estimate discomfort levels, indicated by ipsilateral (DMM injured) to  
137 contralateral (non-injured) weight ratio.

138

### 139 **Statistical analyses**

140 GraphPad PRISM 8 (San Diego, CA) was used for statistical analyses. All data were subjected to  
141 the normality test. For normally distributed data, unpaired student t-test (comparing 2 groups) or  
142 two-way ANOVA with Tukey multiple comparisons test (comparing 2  $\geq$  groups with 2  
143 independent variables) were performed. For data that were not normally distributed, unpaired  
144 non-parametric Mann-Whitney test (comparing 2 groups) or Kruskal-Wallis test with multiple  
145 comparisons using Dunn's corrections (comparing  $> 2$  groups) were used. The data were  
146 expressed as mean $\pm$ SD or mean $\pm$ SEM or mean $\pm$ 95% confidence interval (CI).  $P < 0.05$  was  
147 considered statistically significant.

148

### 149 **References**

- 150 1. Terkeltaub R, Yang B, Lotz M, Liu-Bryan R. Chondrocyte AMP-activated protein kinase  
151 activity suppresses matrix degradation responses to proinflammatory cytokines  
152 interleukin-1 $\beta$  and tumor necrosis factor  $\alpha$ . *Arthritis Rheum* 2011;63:1928-37.
- 153 2. de Oliveira GC, Kanamori KS, Auxiliadora-Martins M, Chini CCS, Chini EN.  
154 Measuring CD38 Hydrolase and Cyclase Activities: 1,N<sup>6</sup>-Ethenonicotinamide Adenine  
155 Dinucleotide ( $\epsilon$ -NAD) and Nicotinamide Guanine Dinucleotide (NGD) Fluorescence-  
156 based Methods. *Bio Protoc.* 2018;8:e2938.
- 157 3. Coulson-Thomas, VJ, Gesteira, TF. Dimethylmethylene Blue Assay (DMMB).Bio-  
158 protocol 2014;4:e1236.
- 159 4. Glasson SS, Blanchet TJ, Morris EA. The surgical destabilization of the medial meniscus  
160 (DMM) model of osteoarthritis in the 129/SvEv mouse. *Osteoarthritis Cartilage* 2007;  
161 15:1061-1069.
- 162 5. Escande C, Nin V, Price NL, Capellini V, Gomes AP, Barbosa MT, et al. Flavonoid  
163 apigenin is an inhibitor of the NAD<sup>+</sup> ase CD38: implications for cellular NAD<sup>+</sup>  
164 metabolism, protein acetylation, and treatment of metabolic syndrome. *Diabetes.*  
165 2013;62:1084-93.
- 166 6. Ma HL, Blanchet TJ, Peluso D, Hopkins B, Morris EA, Glasson SS. Osteoarthritis  
167 severity is sex dependent in a surgical mouse model. *Osteoarthritis Cartilage.*  
168 2007;15:695-700.
- 169 7. Malfait AM, Ritchie J, Gil AS, Austin JS, Hartke J, Qin W, et al. ADAMTS-5 deficient  
170 mice do not develop mechanical allodynia associated with osteoarthritis following medial  
171 meniscal destabilization. *Osteoarthr Cartilage* 2010;18:572–80.
- 172 8. Botter SM, van Osch GJ, Waarsing JH, Day JS, Verhaar JA, Pols HA, et al.  
173 Quantification of subchondral bone changes in a murine osteoarthritis model using  
174 micro-CT. *Biorheology.* 2006;43:379-88.

- 175  
176  
177  
178  
179  
180  
181  
182  
183  
184  
185  
186
9. Glasson SS, Chambers MG, Van Den Berg WB, Little CB. The OARSI histopathology initiative - recommendations for histological assessments of osteoarthritis in the mouse. *Osteoarthritis Cartilage* 2010;18 Suppl 3:S17-23.
  10. Lewis JS, Hembree WC, Furman BD, Tippets L, Cattel D, Huebner JL, et al. Acute joint pathology and synovial inflammation is associated with increased intra-articular fracture severity in the mouse knee. *Osteoarthritis Cartilage*. 2011;19:864-73.
  11. Little CB, Barai A, Burkhardt D, Smith SM, Fosang AJ, Werb Z, et al. Matrix metalloproteinase 13-deficient mice are resistant to osteoarthritic cartilage erosion but not chondrocyte hypertrophy or osteophyte development. *Arthritis Rheum*. 2009;60:3723-33.
  12. Chaplan SR, Bach FW, Pogrel JW, Chung JM, Yaksh TL. Quantitative assessment of tactile allodynia in the rat paw. *J Neurosci Methods* 1994;53:55-63.

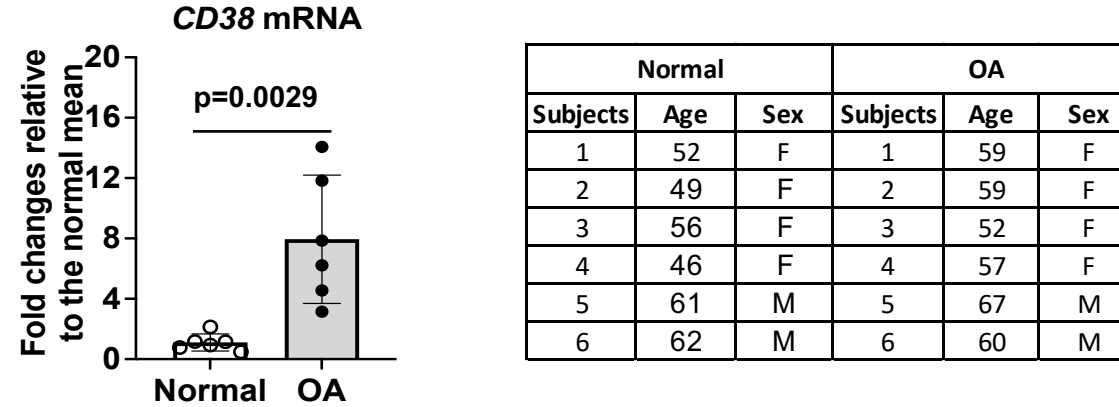

**Suppl Figure 1. Upregulation of CD38 mRNA expression in human knee OA cartilage.** Total RNA directly isolated from age and gender matched human knee cartilage of normal and OA donors (n=6 pair) were subjected to qRT-PCR analysis of CD38 mRNA expression (A). Information about the donors' age and gender was shown in B. Statistical analysis was performed using Student t-test. Data in A were expressed as mean $\pm$ SD. p value with significance was indicated in the figure.

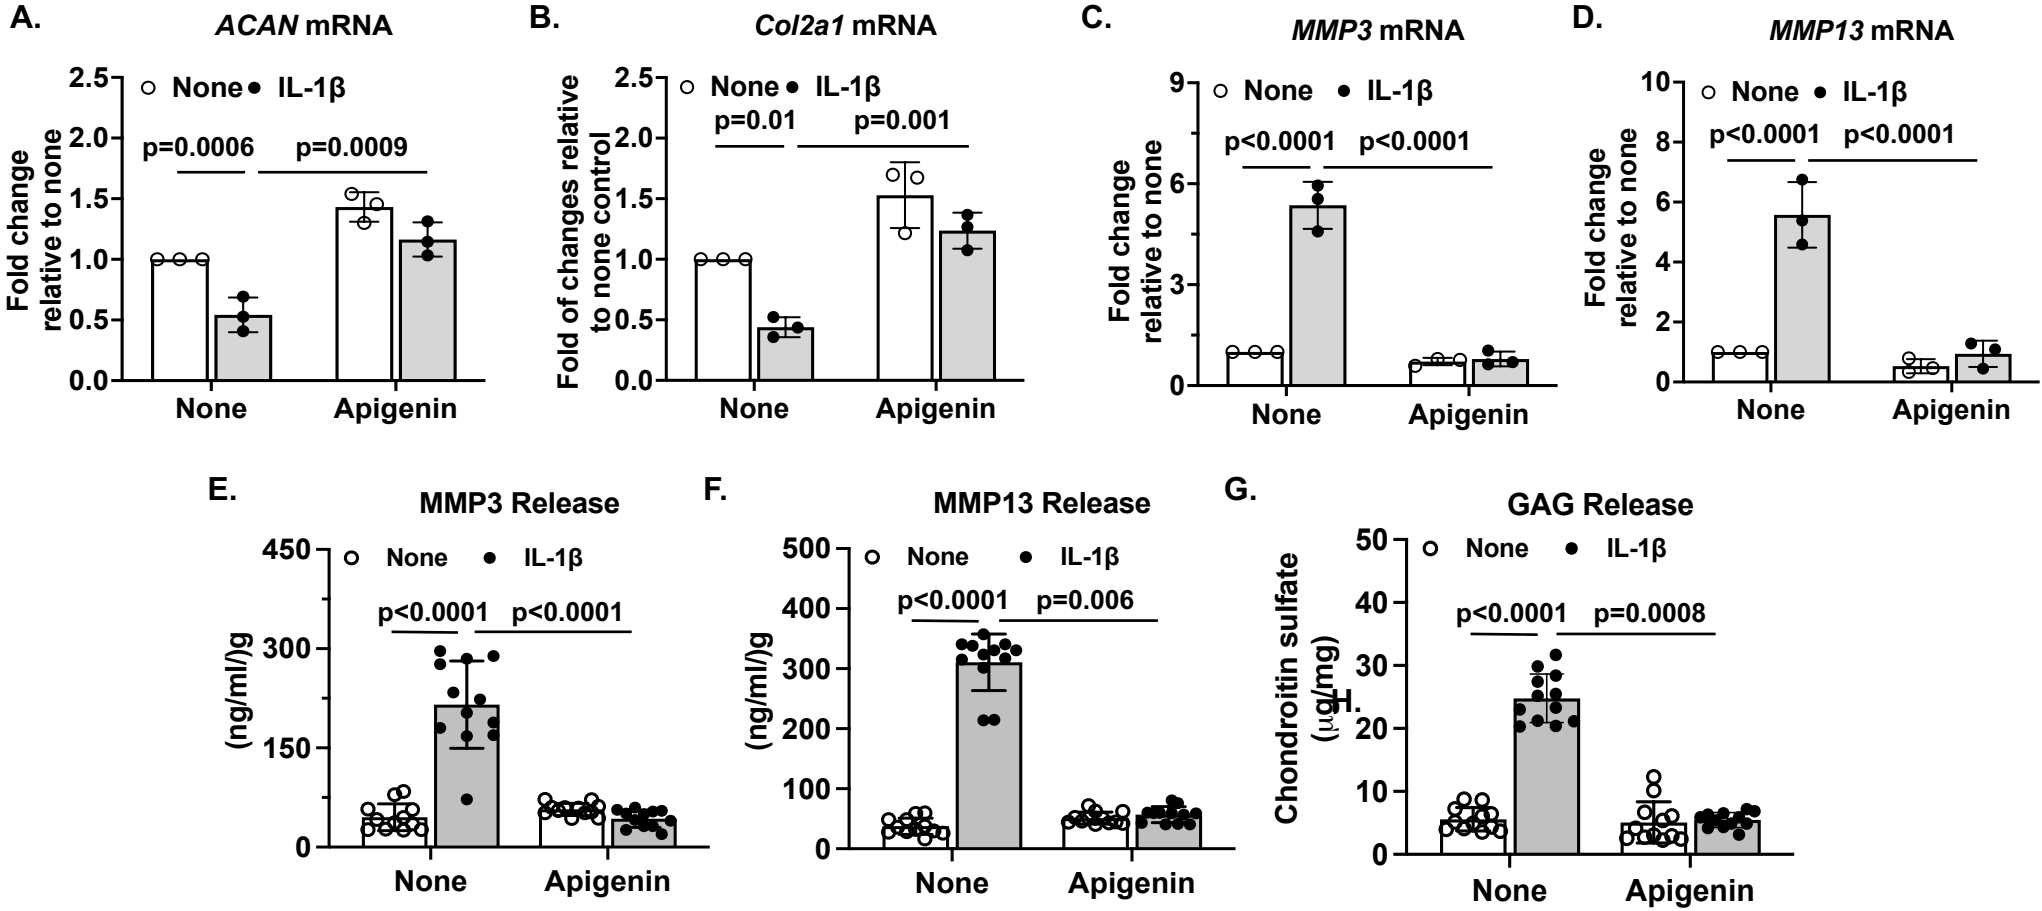

**Suppl Figure 2. Attenuation of chondrocyte catabolic activities induced by IL-1β by apigenin.** Human chondrocytes and human knee cartilage explants were treated with IL-1β (2 ng/ml) in the presence or absence of apigenin (25 μM) for 6 and 24 hours, respectively. The chondrocyte samples were used for evaluating mRNA expression of *ACAN*, *Col2a1*, *MMP3* and *MMP13* by qRT-PCR analysis (A-D), and the cartilage explant samples were used for measuring release of MMP3, MMP13 and glycosaminoglycan (GAG) from the conditioned media by ELISA and the Dimethylmethylene Blue (DMB) dye methods (E-G). For data in A-D, n=3 biological replicates with each representing the mean of 3 technical replicates. For data in E-G, n=12 cartilage explants collected from 4 different donors (3 explants from each donor). Statistical analysis was performed using Two-way ANOVA with Tukey multiple comparison test. All data were expressed as mean±SD. p values with significance were indicated in the figures.

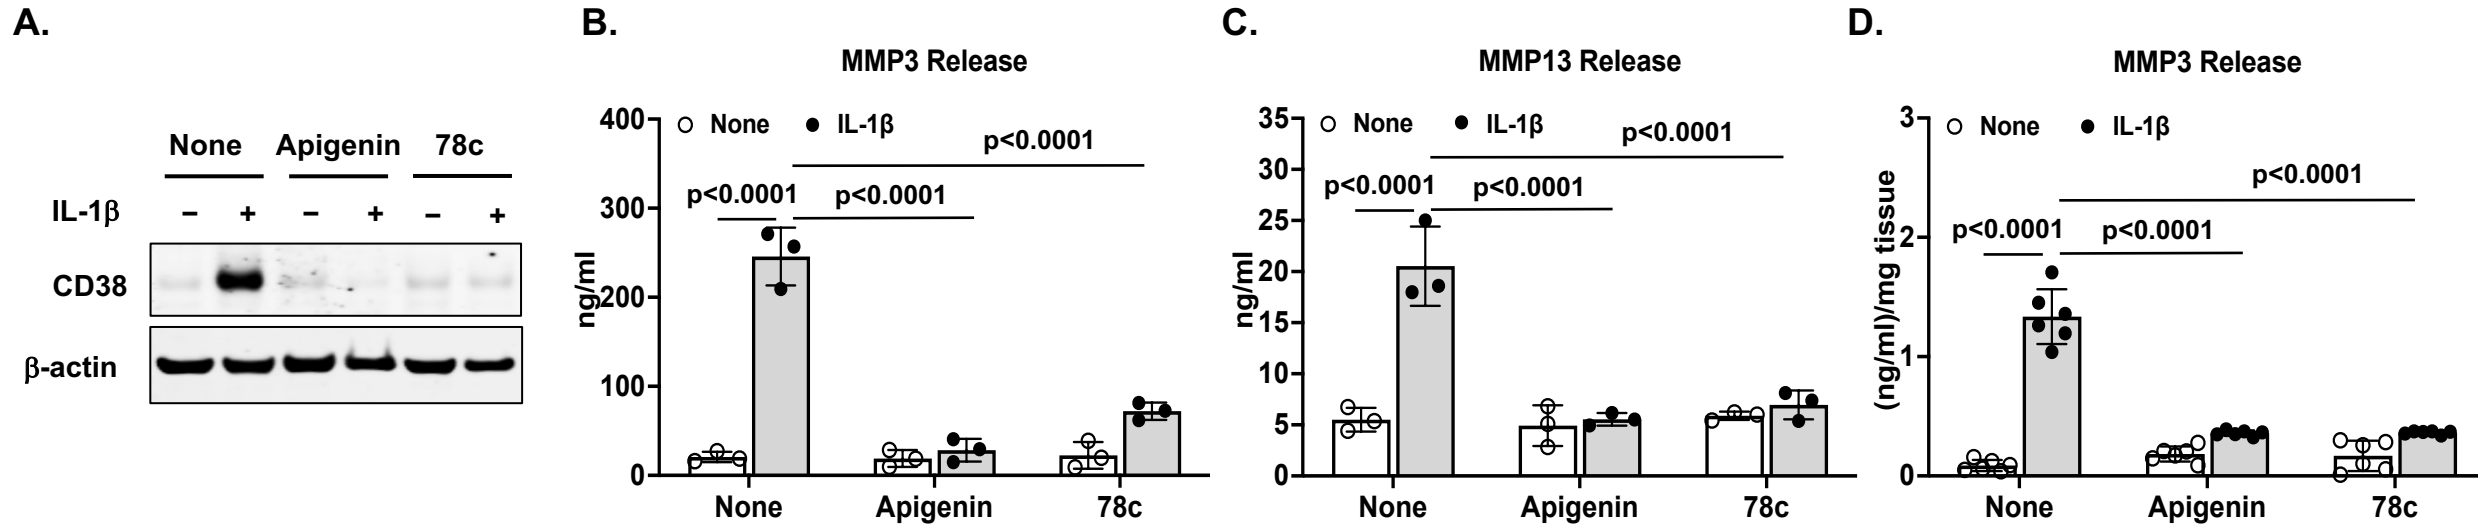

**Suppl Figure 3. The CD38-specific inhibitor 78c had the same effects as apigenin on attenuation of IL-1 $\beta$ -induced CD38 expression and catabolic activity in chondrocytes.** Human chondrocytes were stimulated with IL-1 $\beta$  (2 ng/ml) in the presence or absence of apigenin (25  $\mu$ M) or 78c (25  $\mu$ M) for 18 hours. CD38 protein expression was examined by Western blot analysis (A). Release of MMP3 and MMP13 was measured from the conditioned media by ELISA (B and C). Data in A were representative of 3 independent experiments in chondrocytes from 3 different donors. For data in B and C, n=3 biological replicates with each representing the mean of 3 technical replicates. Statistical analysis was performed using Two-way *ANOVA* with Tukey multiple comparison test. Data were expressed as mean $\pm$ SD. p values with significance were indicated in the figures.



# Suppl Figure 4.

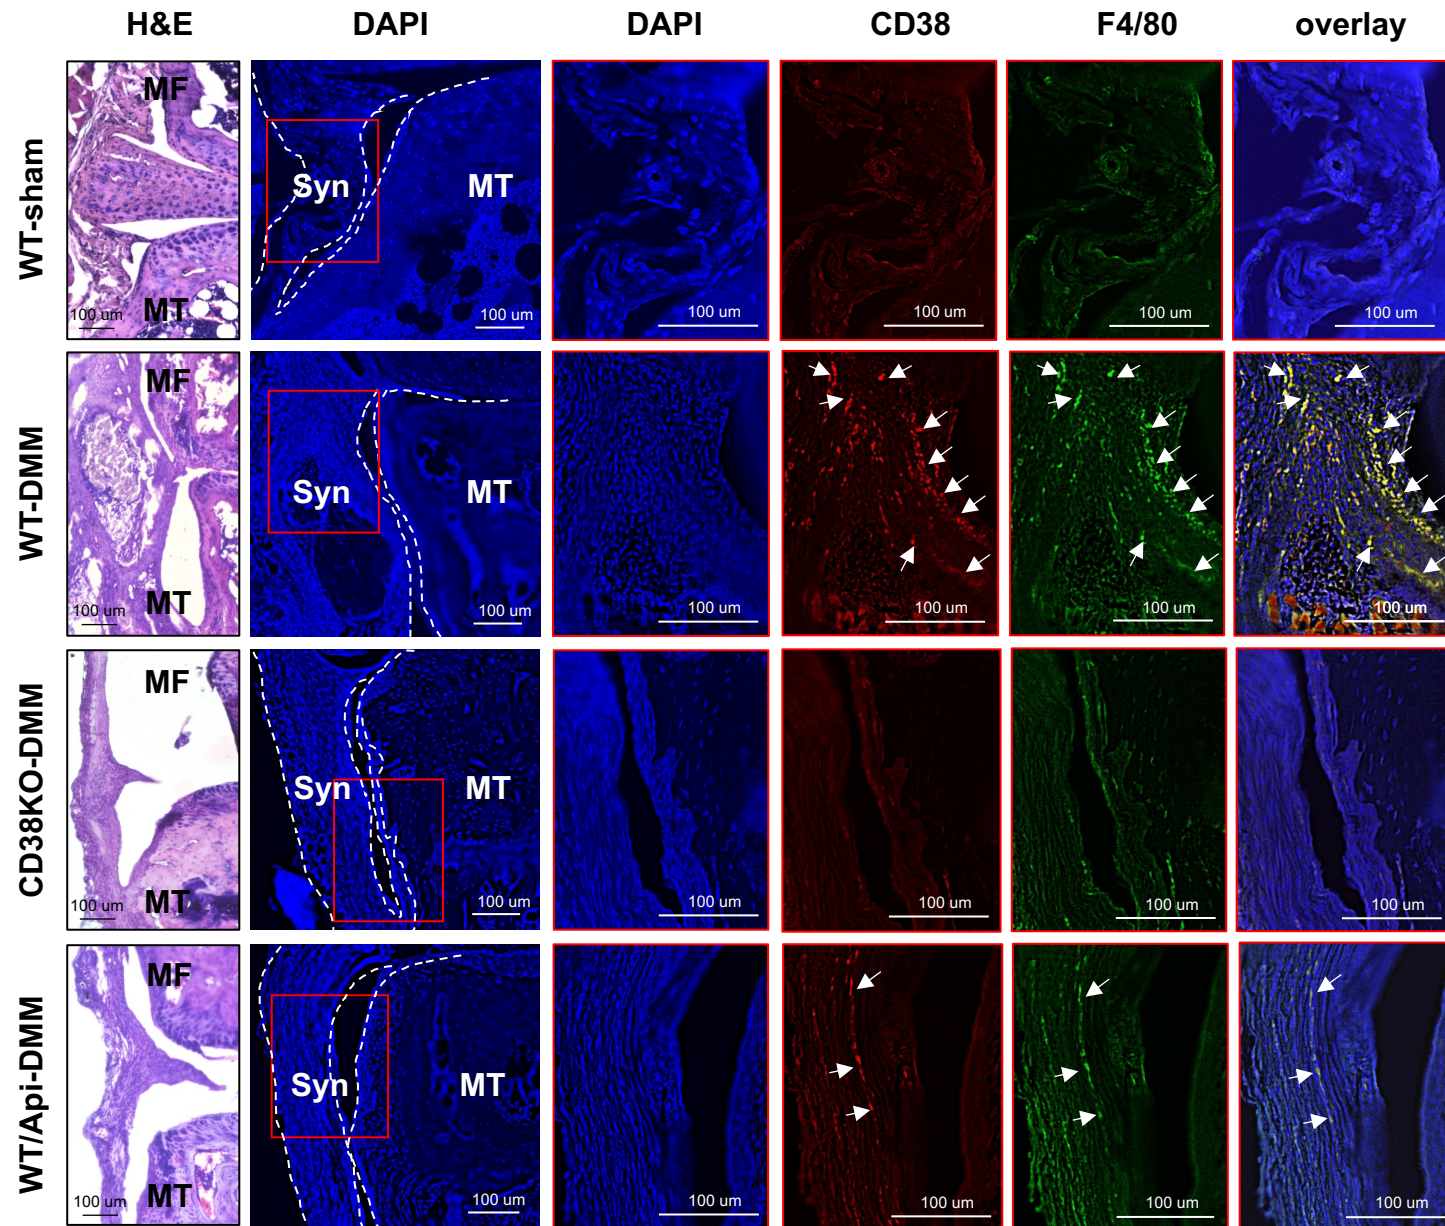

**Suppl Figure 4. Increased CD38 expression in the synovial macrophages in WT but not CD38KO or apigenin-treated WT mice at 2 weeks post-DMM surgery.** Knee sections of WT-sham, WT-DMM, CD38KO-DMM, WT/Api-DMM mice at 2 weeks after DMM surgery were subjected to H&E staining and fluorescence IHC analysis for expression of CD38 (red) and F4/80 (green). DAPI staining (nuclear stain) was included (blue). Representative H&E images of the synovium in the medial femur (MF) and medial tibia (MT) regions and immunostaining images of the synovium (Syn) in the MT region were shown (n=4/group).

Suppl Figure 5.

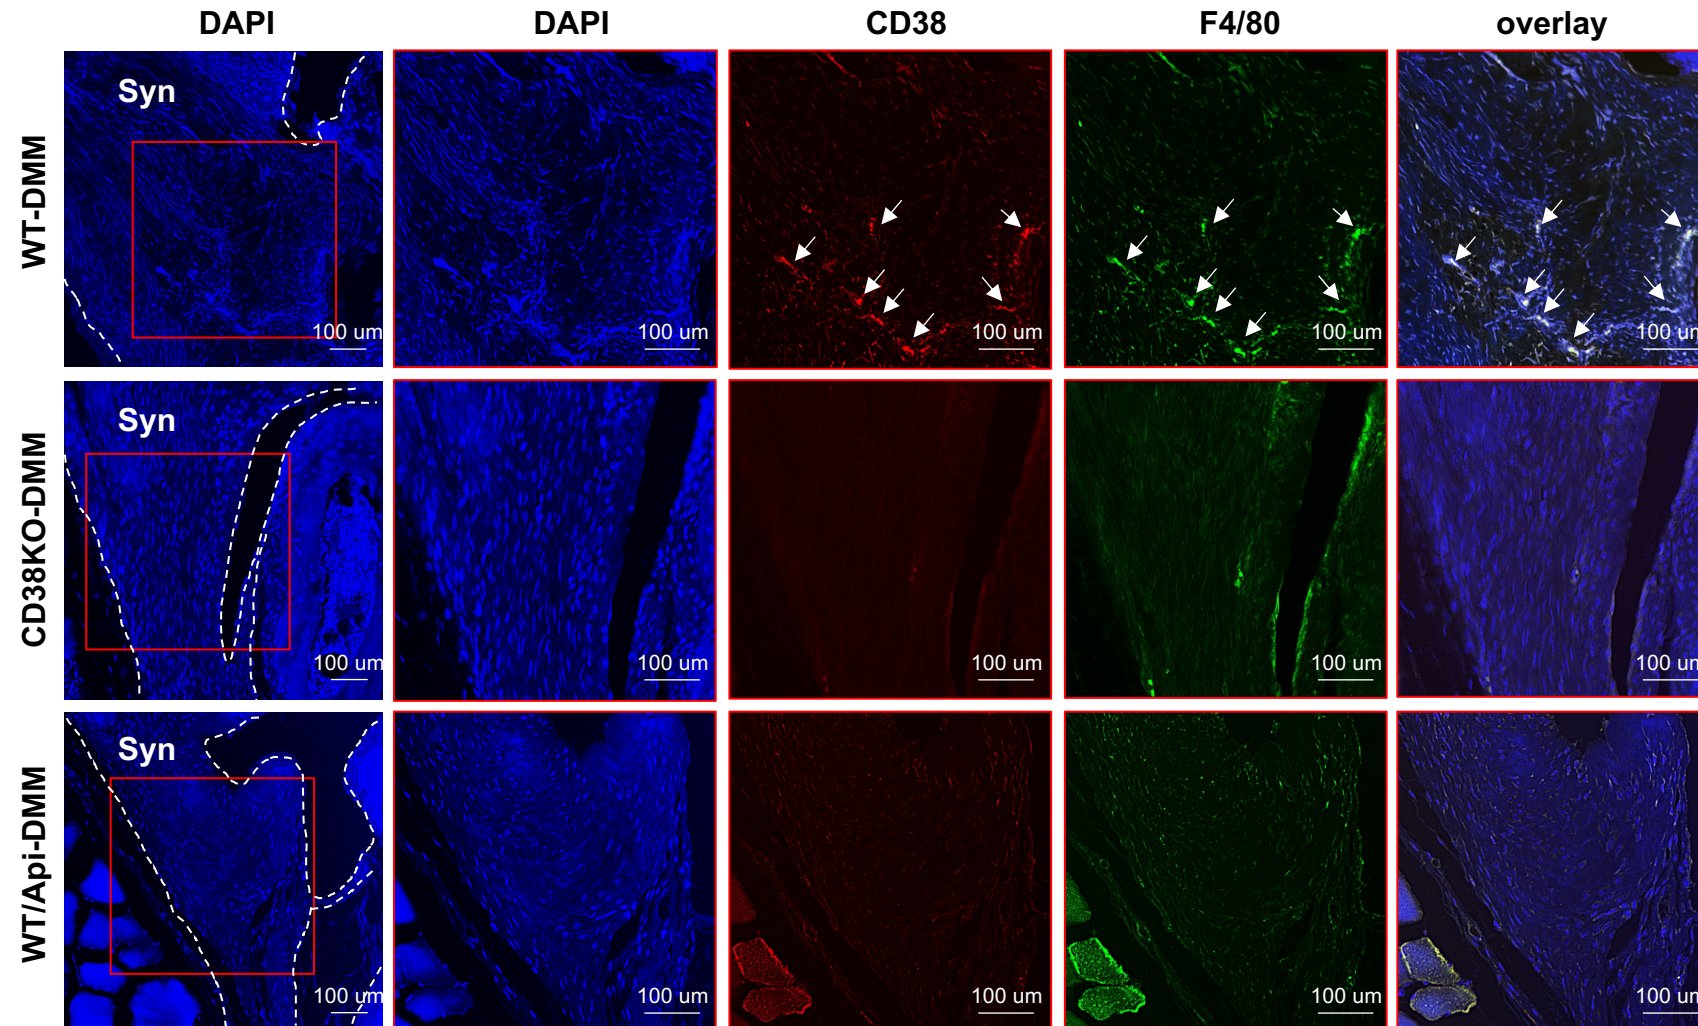

**Suppl Figure 5. Increased CD38 expression in the synovial macrophages in WT but not CD38KO or apigenin-treated WT mice at 10 weeks post-DMM surgery.** WT-DMM, CD38KO-DMM, and WT/Api-DMM mice at 10 weeks after DMM surgery were subjected to fluorescence IHC analysis for expression of CD38 (red) and F4/80 (green). DAPI staining was included (blue). Representative immunostaining images of the synovium (Syn) in the MT compartment were shown (n=4/group).

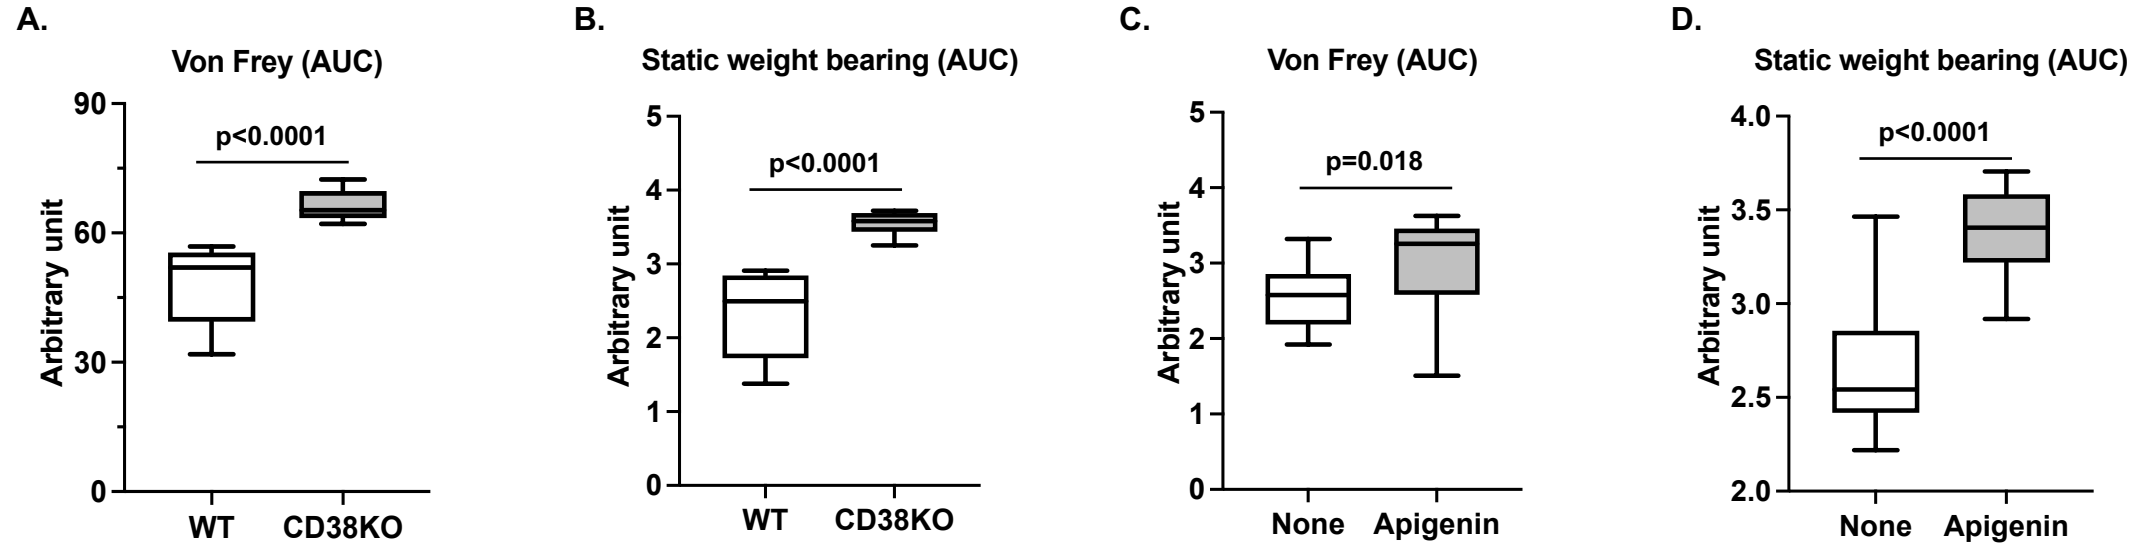

**Suppl Figure 6. Mice with CD38 deficiency exhibited less pain associated with OA post-DMM surgery.** The time course data of Von Frey and weight bearing tests in Figure 6 were presented in the format of Area under curve (AUC) in box plots (Min to Max). For data in A and B,  $n=10$ /group. For data in C and D,  $n=9$ /group. Statistical analysis was conducted using unpaired Student t-test.  $p$  values with significance were indicated in the figures.
